# Supplementary material for: Nifuroxazide Mitigates Angiogenesis in Ehlrich’s Solid Carcinoma: Molecular Docking, Bioinformatic and Experimental Studies on Inhibition of Il-6/Jak2/Stat3 Signaling
Source: Molecules. 2021 Nov 13;26(22):6858. doi: 10.3390/molecules26226858 (PMC8621155; doi:10.3390/molecules26226858)
Supplement: Supplementary file 1 [file molecules-26-06858-s001.zip › molecules-1427390-supplementary.pdf]

Supplementary File

# Nifuroxazide Mitigates Angiogenesis in Ehrlich's Solid Carcinoma: Molecular Docking, Bioinformatic and Experimental Studies on Inhibition of Il-6/Jak2/Stat3 Signaling

Mohamed El-Sherbiny <sup>1,2</sup>, Rehab M. El-Sayed <sup>3,†</sup>, Mohamed A. Helal <sup>4,5</sup>, Afaf T. Ibrahim <sup>6,7</sup>, Hoda S. Elmahdi <sup>6</sup>, Mohamed Ahmed Eladl <sup>8</sup>, Shymaa E. Bilay <sup>9</sup>, Asma M. Alshahrani <sup>10,\*</sup>, Mona K. Tawfik <sup>11</sup>, Ziad E. Hamed <sup>12</sup>, Amany O. Mohamed <sup>13</sup> and Sawsan A. Zaitone <sup>14,15,\*</sup>

<sup>1</sup> Department of Basic Medical Sciences, College of Medicine, AlMaarefa University, Riyadh 71666, Saudi Arabia; msharbini@mcst.edu.sa

<sup>2</sup> Anatomy Department, Faculty of Medicine, Mansoura University, Mansoura 35516, Egypt

<sup>3</sup> Department of Pharmacology & Toxicology, Faculty of Pharmacy, Sinai University, El-Arish 45518, Egypt; rehab.mahmoud@su.edu.eg

<sup>4</sup> Biomedical Sciences Program, University of Science and Technology, Zewail City of Science and Technology, October Gardens, 6<sup>th</sup> of October, Giza 12587, Egypt; Mohamed.hilal@pharm.suez.edu.eg

<sup>5</sup> Medicinal Chemistry Department, Faculty of Pharmacy, Suez Canal University, Ismailia 41522, Egypt

<sup>6</sup> Department of Pathology, Faculty of Medicine, Mansoura University, Mansoura 35516, Egypt; Afaftaha5342@mans.edu.eg (A.T.I.); hoda9\_1@mans.edu.eg (H.S.E.)

<sup>7</sup> Department of Pathology, Faculty of Medicine, Northern Border University, Arar 9280, KSA

<sup>8</sup> Department of Basic Medical Sciences, College of Medicine, University of Sharjah, Sharjah 27272, UAE; meladl@sharjah.ac.ae

<sup>9</sup> Department of Biochemistry, Faculty of Pharmacy, Suez Canal University, Ismailia 41522, Egypt; sshawadfy@yahoo.com

<sup>10</sup> Department of Clinical Pharmacy, College of Pharmacy, King Khalid University, Abha 61421, KSA; Ashahrany@kku.edu.sa

<sup>11</sup> Department of Clinical Pharmacology, Faculty of Medicine, Suez Canal University, Ismailia 41522, Egypt; dmon\_kamal@yahoo.com

<sup>12</sup> Elwaha national high school, Arar 73312, Northern borders region, Saudi Arabia; ziadehabhamed@gmail.com

<sup>13</sup> Department of Medical Biochemistry, Faculty of Medicine, Assiut University, Assiut 71515, Egypt; amanyosama@yahoo.com

<sup>14</sup> Department of Pharmacology & Toxicology, Faculty of Pharmacy, Suez Canal University, Ismailia 41522, Egypt; Sawsan\_zaytoon@pharm.suez.edu.eg

<sup>15</sup> Department of Pharmacology & Toxicology, Faculty of Pharmacy, University of Tabuk, Tabuk 71491, Saudi Arabia

† The authors contributed equally to this manuscript

\* Correspondence: Sawsan\_zaytoon@pharm.suez.edu.eg (S.A.Z.); ashahrany@kku.edu.sa (A.M.A.)

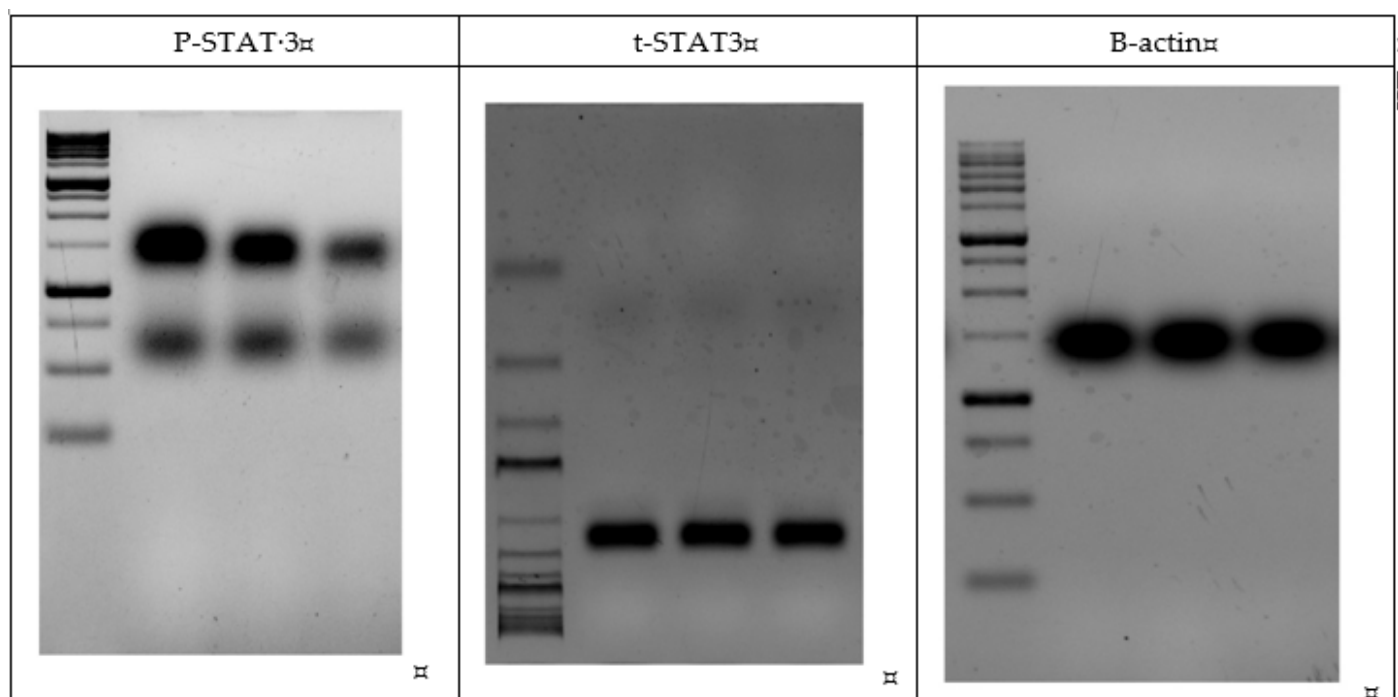

**Figure S1.** Western blot gels for the measured proteins.
